# Supplementary material
Source: HighWire-hosted journal article supplement (https://bmjopen.bmj.com/content/7/7/e016544)
Supplement: inline-supplementary-material-1 [file inline-supplementary-material-1.pdf]

**Supplementary File.** Questionnaire. Items excluded (q 34-36; 39-41) as they were not designed for the current study.

### Influences on students' intention to vaccinate

The NHS recommends a number of vaccinations for individuals of different ages and high-risk groups, free of charge. The NHS childhood vaccination programme offers a range of vaccines for children from 2 months up until they are 18. These vaccines protect children against vaccine-preventable diseases such as measles, human papillomavirus (HPV) and polio. People in the UK are also eligible for some free travel vaccines if they are visiting high-risk areas of the world.

We are interested in understanding students' attitudes towards vaccination.

Please read each of the statements below and show how much you agree or disagree with it by ticking the appropriate box.

\* 2. Vaccinations are effective in preventing disease.

|                       |                       |                            |                       |                       |
|-----------------------|-----------------------|----------------------------|-----------------------|-----------------------|
| Strongly disagree     | Disagree              | Neither agree nor disagree | Agree                 | Strongly agree        |
| <input type="radio"/> | <input type="radio"/> | <input type="radio"/>      | <input type="radio"/> | <input type="radio"/> |

\* 3. I am concerned about vaccination side effects.

|                       |                       |                            |                       |                       |
|-----------------------|-----------------------|----------------------------|-----------------------|-----------------------|
| Strongly disagree     | Disagree              | Neither agree nor disagree | Agree                 | Strongly agree        |
| <input type="radio"/> | <input type="radio"/> | <input type="radio"/>      | <input type="radio"/> | <input type="radio"/> |

\* 4. Vaccinations are helpful.

|                       |                       |                            |                       |                       |
|-----------------------|-----------------------|----------------------------|-----------------------|-----------------------|
| Strongly disagree     | Disagree              | Neither agree nor disagree | Agree                 | Strongly agree        |
| <input type="radio"/> | <input type="radio"/> | <input type="radio"/>      | <input type="radio"/> | <input type="radio"/> |

\* 5. I am afraid of vaccinations.

|                       |                       |                            |                       |                       |
|-----------------------|-----------------------|----------------------------|-----------------------|-----------------------|
| Strongly disagree     | Disagree              | Neither agree nor disagree | Agree                 | Strongly agree        |
| <input type="radio"/> | <input type="radio"/> | <input type="radio"/>      | <input type="radio"/> | <input type="radio"/> |

\* 6. There are more reasons to have vaccinations than not to have vaccinations.

|                       |                       |                            |                       |                       |
|-----------------------|-----------------------|----------------------------|-----------------------|-----------------------|
| Strongly disagree     | Disagree              | Neither agree nor disagree | Agree                 | Strongly agree        |
| <input type="radio"/> | <input type="radio"/> | <input type="radio"/>      | <input type="radio"/> | <input type="radio"/> |

\* 7. I have a responsibility to receive vaccinations for the protection of others.

|                       |                       |                            |                       |                       |
|-----------------------|-----------------------|----------------------------|-----------------------|-----------------------|
| Strongly disagree     | Disagree              | Neither agree nor disagree | Agree                 | Strongly agree        |
| <input type="radio"/> | <input type="radio"/> | <input type="radio"/>      | <input type="radio"/> | <input type="radio"/> |

\* 8. People who don't get vaccinated put others at risk.

|                       |                       |                            |                       |                       |
|-----------------------|-----------------------|----------------------------|-----------------------|-----------------------|
| Strongly disagree     | Disagree              | Neither agree nor disagree | Agree                 | Strongly agree        |
| <input type="radio"/> | <input type="radio"/> | <input type="radio"/>      | <input type="radio"/> | <input type="radio"/> |

\* 9. More people should be vaccinated against diseases so that outbreaks do not occur.

|                       |                       |                            |                       |                       |
|-----------------------|-----------------------|----------------------------|-----------------------|-----------------------|
| Strongly disagree     | Disagree              | Neither agree nor disagree | Agree                 | Strongly agree        |
| <input type="radio"/> | <input type="radio"/> | <input type="radio"/>      | <input type="radio"/> | <input type="radio"/> |

\* 10. Vaccinating is doing the right thing.

|                       |                       |                            |                       |                       |
|-----------------------|-----------------------|----------------------------|-----------------------|-----------------------|
| Strongly disagree     | Disagree              | Neither agree nor disagree | Agree                 | Strongly agree        |
| <input type="radio"/> | <input type="radio"/> | <input type="radio"/>      | <input type="radio"/> | <input type="radio"/> |

\* 11. Vaccination is one way to make a positive contribution to your health.

|                       |                       |                            |                       |                       |
|-----------------------|-----------------------|----------------------------|-----------------------|-----------------------|
| Strongly disagree     | Disagree              | Neither agree nor disagree | Agree                 | Strongly agree        |
| <input type="radio"/> | <input type="radio"/> | <input type="radio"/>      | <input type="radio"/> | <input type="radio"/> |





## Influences on students' intention to vaccinate

We're also interested in how *in control* you would feel about getting the typhoid vaccine.

\* 22. Whether or not I got the vaccine would be entirely up to me.

Strongly disagree

(1)

2

3

4

5

6

Strongly agree (7)

\* 23. How much do you feel that whether you got the vaccine would be beyond your control?

Not at all (1)

2

3

4

5

6

Very much so (7)



## Influences on students' intention to vaccinate

Please tick the box that applies most to you.

\* 28. Did you have all the recommended vaccines as a child?

- I had none of the recommended vaccines as a child
- I had a few of the recommended vaccines as a child
- I had most of the recommended vaccines as a child
- I had all of the recommended vaccines as a child
- I don't know what vaccines I had as a child

\* 29. Have you ever had a bad reaction to a vaccination?

- Yes
- No
- Don't know

## Influences on students' intention to vaccinate

\* 30. If yes, how serious was your reaction?

- Required medical treatment
- Uncomfortable for more than 1 day (no medical treatment)
- Uncomfortable for less than one day (no medical treatment)
- I don't know



## Influences on students' intention to vaccinate

\* 31. Are you scared of needles?

Not at all (1)

2

3

4

Very scared (5)

## Influences on students' intention to vaccinate

\* 32. If I were recommended a vaccine, I would try to get it.

| Strongly disagree (1) | 2                     | 3                     | 4                     | Strongly agree (5)    |
|-----------------------|-----------------------|-----------------------|-----------------------|-----------------------|
| <input type="radio"/> | <input type="radio"/> | <input type="radio"/> | <input type="radio"/> | <input type="radio"/> |

\* 33. If I were recommended a vaccine, I would intend to get it.

| Strongly disagree (1) | 2                     | 3                     | 4                     | Strongly agree (5)    |
|-----------------------|-----------------------|-----------------------|-----------------------|-----------------------|
| <input type="radio"/> | <input type="radio"/> | <input type="radio"/> | <input type="radio"/> | <input type="radio"/> |

## Influences on students' intention to vaccinate

Now we'd like to ask you some more general questions about your health.

Imagine you had a problem with your health.

37. Would you use any of these sources for information? For sources that you would use, please specify the name of the source. For example, for the internet, you might use the NHS website.

|                                                            |                      |
|------------------------------------------------------------|----------------------|
| Books                                                      | <input type="text"/> |
| Brochures, pamphlets                                       | <input type="text"/> |
| Family                                                     | <input type="text"/> |
| Friend/Co-worker                                           | <input type="text"/> |
| Doctor or health care provider                             | <input type="text"/> |
| Internet                                                   | <input type="text"/> |
| Library                                                    | <input type="text"/> |
| Magazines                                                  | <input type="text"/> |
| Newspapers                                                 | <input type="text"/> |
| Telephone information number                               | <input type="text"/> |
| Complementary, alternative, or unconventional practitioner | <input type="text"/> |
| Other                                                      | <input type="text"/> |

Imagine you have been recommended to have a vaccination as part of the UK Immunisation Schedule.

38. Would you use any of these sources for information on the vaccine? For sources that you would use, please specify the name of the source. For example, for the internet, you might use the NHS website.

Books

Brochures, pamphlets

Family

Friend/Co-worker

Doctor or health care provider

Internet

Library

Magazines

Newspapers

Telephone information number

Complementary, alternative, or unconventional practitioner

Other

## Influences on students' intention to vaccinate

We are now going to ask some demographic questions.

\* 42. What is your age?

\* 43. What is your gender?

- Male
- Female
- Prefer not to say

\* 44. Do you have any children?

- Yes
- No
- Prefer not to say

\* 45. What is your ethnic group? (Please tick one box)

- White British
- White other (*please specify below*)
- Asian British
- Asian other (*please specify below*)
- Black British
- Black other (*please specify below*)
- Mixed ethnicity British (*please specify below*)
- Mixed ethnicity other (*please specify below*)
- Arab
- Other ethnic group (*please specify below*)
- Prefer not to say

Please specify here, if asked

\* 46. Where did you live until the age of 4?

- UK
- Not UK (*please specify below*)
- Both (*please specify below*)

Please specify here, if asked

\* 47. Do you have a religion?

- No religion
- Christian (including Church of England, Catholic, Protestant and all other Christian denominations)
- Buddhist
- Hindu
- Jewish
- Muslim
- Sikh
- Prefer not to say
- Any other religion (*please specify*)

Think of this ladder as representing where people stand in the UK.

At the *top* of the ladder are the people who are best off – those who have the most money, the most education and the most respected jobs. At the *bottom* are the people who are the worst off – who have the least money, least education, and the least respected jobs or no job. The higher up you are on this ladder, the closer you are to the people at the very top; the lower you are, the closer you are to the people at the very bottom.

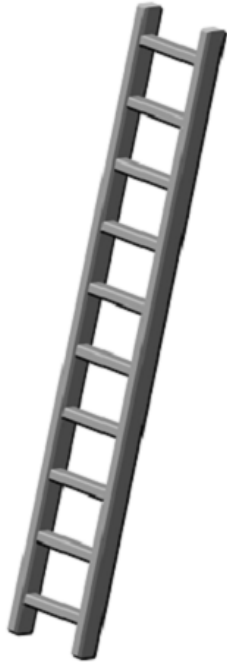

\* 48. Now think about your family. Please tell us where you think your family would be on this ladder.

Please tick the box next to the rung that best represents where your family would be on this ladder.

- Top: Rung 10
- Rung 9
- Rung 8
- Rung 7
- Rung 6
- Rung 5
- Rung 4
- Rung 3
- Rung 2
- Bottom: Rung 1

\* 49. Where would you place yourself on this ladder?

Please tick the box next to the rung where you think you stand at this time in your life, relative to other people in the UK.

- Top: Rung 10
- Rung 9
- Rung 8
- Rung 7
- Rung 6
- Rung 5
- Rung 4
- Rung 3
- Rung 2
- Bottom: Rung 1
